# Supplementary material for: The high level of IL-1β in the serum of ACLF patients induces increased IL-8 expression in hUC-MSCs and reduces the efficacy of hUC-MSCs in liver failure
Source: PubMed Central journal article supplement (PMC10468895; doi:10.1186/s13287-023-03455-9), 2023-08-30
Supplement: 13287_2023_3455_MOESM1_ESM.pdf [file 13287_2023_3455_MOESM1_ESM.pdf]

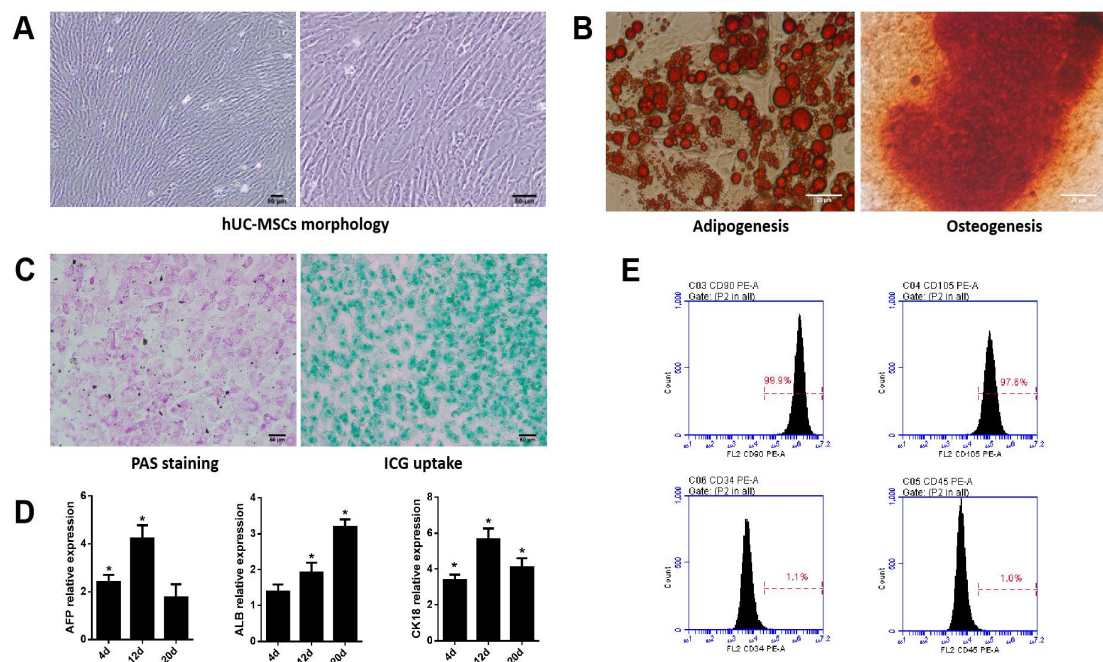

Fig s1 Identification of hUC-MSCs. (A) Observation of cell morphology under an optical microscope. (B) Detection of adipogenesis and osteogenesis capacity of hUC-MSCs. (C) Glycogen staining and indocyanine green uptake were used to determine the function of hepatocyte-like cells. (D) The expression levels of AFP, CK18 and ALB in hUC-MSCs were detected by Q-PCR at different induction times. (E) Analysis of hUC-MSCs surface markers by flow cytometry.

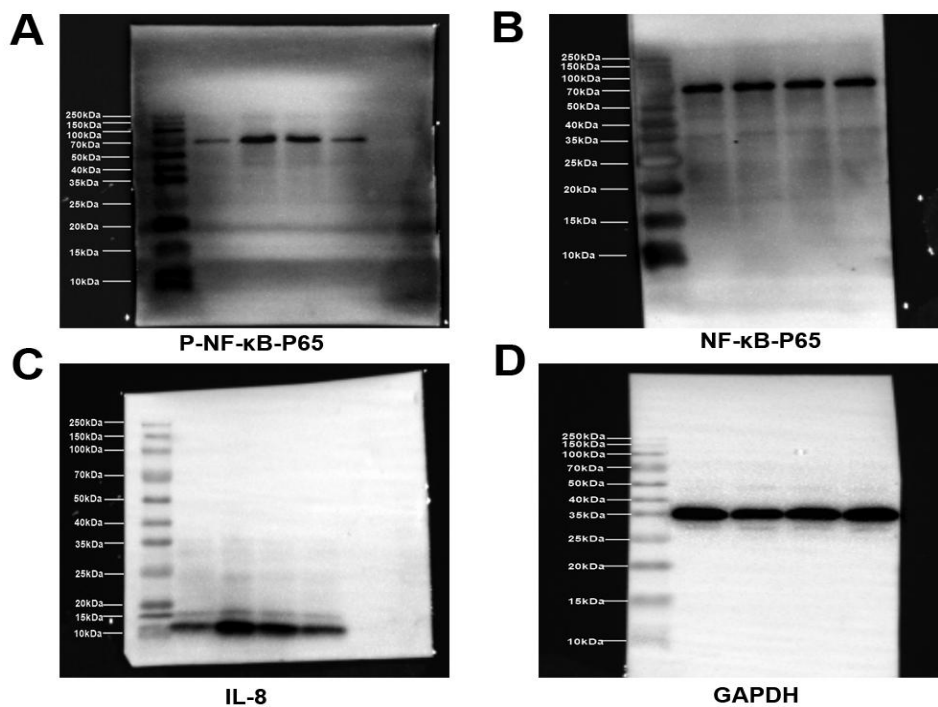

Fig s2 Original picture of the full-length blots. (A) p-NF-κB-p65. (B) NF-κB-p65. (C) IL-8. (D) GAPDH.

Table s1 Primer sequences of 22 factors in hUC-MSCs

| Primer name      | 5' -primer sequence-3'  | Primer name     | 5' -primer sequence-3'  |
|------------------|-------------------------|-----------------|-------------------------|
| GAPDH-F          | GGAGCGAGATCCCTCCAAAAT   | MIP-1a-F        | TGCCAAACAGCCACACT       |
| GAPDH-R          | GGCTGTTGTCATACTTCTCATGG | MIP-1a-R        | GGGGACAGGGGAACTCT       |
| IDO1-F           | TGCCAACTCTCCAAGAAAC     | MCP-1-F         | TTTTCCCCTAGCTTTCCC      |
| IDO1-R           | GCAGTCTCCATCACGAAAT     | MCP-1-R         | GCAATTTCCCAAGTCTCT      |
| SDF1a-F          | CCAACGTCAAGCATCTCA      | CXCR4-F         | CAAGCAAGGGTGTGAGTTT     |
| SDF1a-R          | CACTTTAGCTTCGGGTCAA     | CXCR4-R         | AGCATAGAGGATGGGGTTC     |
| MCH-II-F         | CCAGTTTTACGGTCCCTCT     | IL2-F           | AACTCACCAGGATGCTCACA    |
| MCH-II-R         | GCCACAGCCATGTTTCTC      | IL2-R           | GCACTTCCTCCAGAGGTTTGA   |
| IL4-F            | GCATCGTTAGCTTCTCCTG     | M-CSF-F         | GTGGGAGAGAGCAAGGGA      |
| IL4-R            | ATATCGCACTTGTGTCCGT     | M-CSF-R         | GGGTTTGGGAGTGCAGAC      |
| VEGF-F           | CTGGGCTGTTCTCGCTT       | IL-1 $\beta$ -F | CACGATGCACCTGTACGA      |
| VEGF-R           | CCCCTCTCCTCTTCCTTCT     | IL-1 $\beta$ -R | AACACCACTTGTTGCTCCA     |
| IL8-F            | GACATACTCCAAACCTTTCCA   | IL10-F          | GACTTTAAGGGTTACCTGGGTTG |
| IL8-R            | AACTTCTCCACAACCCTCTG    | IL10-R          | TCACATGCGCCTTGATGTCTG   |
| IFN- $\gamma$ -F | ACTTGAATGTCCAACGCAA     | IL6-F           | CCTGAACCTTCCAAAGATGGC   |
| IFN- $\gamma$ -R | CGAAACAGCATCTGACTCC     | IL6-R           | TTCACCAGGCAAGTCTCCTCA   |
| ICAM1-F          | ACCTGCCTTTCCCCAGA       | HGF-F           | GCTATCGGGGTAAAGACCTACA  |
| ICAM1-R          | ACCGCTGAGTGTCATTGTG     | HGF-R           | CGTAGCGTACCTCTGGATTGC   |
| FGF2-F           | GAGGACCCATAAGAGTTCACA   | TNFa-F          | GAGGCCAAGCCCTGGTATG     |
| FGF2-R           | TGCAGCCTTACCCAATCTA     | TNFa-R          | CGGGCCGATTGATCTCAGC     |
| SCF -F           | GCTCACCCATATCCCACTAT    | TGF $\beta$ -F  | CTAATGGTGGAACCCACAACG   |
| SCF -R           | GTTCTTAACTTCTTCCTGCGA   | TGF $\beta$ -R  | TATCGCCAGGAATTGTTGCTG   |
| LIF-F            | CCAGCATTGTGTTGTGAGG     |                 |                         |
| LIF-R            | TGTTCCAGGGCGCTATTT      |                 |                         |

Table s2 Primers sequence of key factors in IL-1 $\beta$  related signaling pathway

| Primer name | 5' -primer sequence-3' |
|-------------|------------------------|
| NF-KB-P65_F | ATGCGCTTCCGCTACAA      |
| NF-KB-P65_R | GTGACCAGGGAGATGCG      |
| API_F       | AGCGGACCTTATGGCTACA    |
| API_R       | GTGATGTGCCCGTTGCT      |
| MAPK_F      | TACGACCCGAGTGACGA      |
| MAPK_R      | TCTGAGCCCTTGTCCTGA     |
| JUK_F       | TCTCCAACACCCGTACATC    |
| JUK_R       | CCTCCAAGTCCATAACTTCCT  |
| P38_F       | TCCAGACCATTTCAGTCCA    |
| P38_R       | CGTCCAACAGACCAATCAC    |
| IKKa_F      | CACAGACCTTCAGATCACTCC  |
| IKKa_R      | TGCTTACAGCCCAACAAC     |
| NF-KB-P52_F | GCACCTAGCCATCATCCAC    |
| NF-KB-P52_R | TACCCGCAGCAGAAAGC      |

Table s3 Interference sequence of siRNA-IL-8

| siRNA name |           | 5' -interference sequence-3' |
|------------|-----------|------------------------------|
| siRNA-IL-8 | Sense     | GCCAGAUGCAAUACAAGAUTT        |
| siRNA-IL-8 | Antisense | AUCUUGUAUUGCAUCUGGCTT        |
